# Supplementary material for: Age-Related Alterations in the Expression of Genes and Synaptic Plasticity Associated with Nitric Oxide Signaling in the Mouse Dorsal Striatum
Source: Hindawi journal article supplement (doi:10.1155/2015/458123), 2015-01-01
Supplement: f1 [file 458123.f1.pdf]

Supplementary Table 1

**PAMM-062Z**

| <b>Position</b> | <b>Refseq</b> | <b>Symbol</b> | <b>Description</b>                                                                    |
|-----------------|---------------|---------------|---------------------------------------------------------------------------------------|
| A01             | NM_013930     | Aass          | Aminoadipate-semialdehyde synthase                                                    |
| A02             | NM_028717     | Als2          | Amyotrophic lateral sclerosis 2 (juvenile) homolog (human)                            |
| A03             | NM_009696     | Apoe          | Apolipoprotein E                                                                      |
| A04             | NM_007527     | Bax           | Bcl2-associated X protein                                                             |
| A05             | NM_009743     | Bcl2l1        | Bcl2-like 1                                                                           |
| A06             | NM_009790     | Calm1         | Calmodulin 1                                                                          |
| A07             | NM_009795     | Capns1        | Calpain, small subunit 1                                                              |
| A08             | NM_009804     | Cat           | Catalase                                                                              |
| A09             | NM_007616     | Cav1          | Caveolin 1, caveolae protein                                                          |
| A10             | NM_007631     | Ccnd1         | Cyclin D1                                                                             |
| A11             | NM_009831     | Ccng1         | Cyclin G1                                                                             |
| A12             | NM_016892     | Ccs           | Copper chaperone for superoxide dismutase                                             |
| B01             | NM_009842     | Cd151         | CD151 antigen                                                                         |
| B02             | NM_007669     | Cdkn1a        | Cyclin-dependent kinase inhibitor 1A (P21)                                            |
| B03             | NM_019952     | Clcf1         | Cardiotrophin-like cytokine factor 1                                                  |
| B04             | NM_007798     | Ctsb          | Cathepsin B                                                                           |
| B05             | NM_007806     | Cyba          | Cytochrome b-245, alpha polypeptide                                                   |
| B06             | NM_026993     | Ddah1         | Dimethylarginine dimethylaminohydrolase 1                                             |
| B07             | NM_016765     | Ddah2         | Dimethylarginine dimethylaminohydrolase 2                                             |
| B08             | NM_007864     | Dlg4          | Discs, large homolog 4 (Drosophila)                                                   |
| B09             | NM_019682     | Dynll1        | Dynein light chain LC8-type 1                                                         |
| B10             | NM_007913     | Egr1          | Early growth response 1                                                               |
| B11             | NM_007946     | Epx           | Eosinophil peroxidase                                                                 |
| B12             | NM_007949     | Ercc2         | Excision repair cross-complementing rodent repair deficiency, complementation group 2 |
| C01             | NM_007987     | Fas           | Fas (TNF receptor superfamily member 6)                                               |
| C02             | NM_010234     | Fos           | FBJ osteosarcoma oncogene                                                             |
| C03             | NM_021356     | Gab1          | Growth factor receptor bound protein 2-associated protein 1                           |
| C04             | NM_007836     | Gadd45a       | Growth arrest and DNA-damage-inducible 45 alpha                                       |
| C05             | NM_008160     | Gpx1          | Glutathione peroxidase 1                                                              |
| C06             | NM_030677     | Gpx2          | Glutathione peroxidase 2                                                              |
| C07             | NM_008161     | Gpx3          | Glutathione peroxidase 3                                                              |
| C08             | NM_008162     | Gpx4          | Glutathione peroxidase 4                                                              |
| C09             | NM_010343     | Gpx5          | Glutathione peroxidase 5                                                              |
| C10             | NM_145451     | Gpx6          | Glutathione peroxidase 6                                                              |
| C11             | NM_024198     | Gpx7          | Glutathione peroxidase 7                                                              |
| C12             | NM_008169     | Grin1         | Glutamate receptor, ionotropic, NMDA1 (zeta 1)                                        |
| D01             | NM_010439     | Hmgb1         | High mobility group box 1                                                             |
| D02             | NM_008281     | Hpn           | Hepsin                                                                                |
| D03             | NM_010497     | Idh1          | Isocitrate dehydrogenase 1 (NADP+), soluble                                           |
| D04             | NM_008326     | Irgm1         | Immunity-related GTPase family M member 1                                             |
| D05             | NM_010786     | Mdm2          | Transformed mouse 3T3 cell double minute 2                                            |
| D06             | NM_026119     | Med4          | Mediator of RNA polymerase II transcription, subunit 4 homolog (yeast)                |
| D07             | NM_010824     | Mpo           | Myeloperoxidase                                                                       |
| D08             | NM_010849     | Myc           | Myelocytomatosis oncogene                                                             |
| D09             | NM_010877     | Ncf2          | Neutrophil cytosolic factor 2                                                         |
| D10             | NM_008682     | Nedd1         | Neural precursor cell expressed, developmentally down-regulated gene 1                |
| D11             | NM_008712     | Nos1          | Nitric oxide synthase 1, neuronal                                                     |
| D12             | NM_010927     | Nos2          | Nitric oxide synthase 2, inducible                                                    |
| E01             | NM_008713     | Nos3          | Nitric oxide synthase 3, endothelial cell                                             |

|     |           |          |                                                              |
|-----|-----------|----------|--------------------------------------------------------------|
| E02 | NM_172203 | Nox1     | NADPH oxidase 1                                              |
| E03 | NM_015760 | Nox4     | NADPH oxidase 4                                              |
| E04 | NM_172204 | Noxa1    | NADPH oxidase activator 1                                    |
| E05 | NM_027988 | Noxo1    | NADPH oxidase organizer 1                                    |
| E06 | NM_172527 | Nudt15   | Nudix (nucleoside diphosphate linked moiety X)-type motif 15 |
| E07 | NM_011063 | Pea15a   | Phosphoprotein enriched in astrocytes 15A                    |
| E08 | NM_133819 | Ppp1r15b | Protein phosphatase 1, regulatory (inhibitor) subunit 15b    |
| E09 | NM_008913 | Ppp3ca   | Protein phosphatase 3, catalytic subunit, alpha isoform      |
| E10 | NM_011034 | Prdx1    | Peroxiredoxin 1                                              |
| E11 | NM_011563 | Prdx2    | Peroxiredoxin 2                                              |
| E12 | NM_007453 | Prdx6    | Peroxiredoxin 6                                              |
| F01 | NM_008854 | Prkaca   | Protein kinase, cAMP dependent, catalytic, alpha             |
| F02 | NM_011170 | Prnp     | Prion protein                                                |
| F03 | NM_027297 | Prpf4    | PRP4 pre-mRNA processing factor 4 homolog (yeast)            |
| F04 | NM_011186 | Psmb5    | Proteasome (prosome, macropain) subunit, beta type 5         |
| F05 | NM_008987 | Ptx3     | Pentraxin related gene                                       |
| F06 | NM_009029 | Rb1      | Retinoblastoma 1                                             |
| F07 | NM_058214 | Recql4   | RecQ protein-like 4                                          |
| F08 | NM_023396 | Rprm     | Reprimo, TP53 dependent G2 arrest mediator candidate         |
| F09 | NM_009101 | Rras     | Harvey rat sarcoma oncogene, subgroup R                      |
| F10 | NM_010925 | Rrp1     | Ribosomal RNA processing 1 homolog ( <i>S. cerevisiae</i> )  |
| F11 | NM_009127 | Scd1     | Stearoyl-Coenzyme A desaturase 1                             |
| F12 | NM_009128 | Scd2     | Stearoyl-Coenzyme A desaturase 2                             |
| G01 | NM_024450 | Scd3     | Stearoyl-coenzyme A desaturase 3                             |
| G02 | NM_018754 | Sfn      | Stratifin                                                    |
| G03 | NM_011434 | Sod1     | Superoxide dismutase 1, soluble                              |
| G04 | NM_013671 | Sod2     | Superoxide dismutase 2, mitochondrial                        |
| G05 | NM_011435 | Sod3     | Superoxide dismutase 3, extracellular                        |
| G06 | NM_009417 | Tpo      | Thyroid peroxidase                                           |
| G07 | NM_011640 | Trp53    | Transformation related protein 53                            |
| G08 | NM_023719 | Txnip    | Thioredoxin interacting protein                              |
| G09 | NM_013711 | Txnrd2   | Thioredoxin reductase 2                                      |
| G10 | NM_019639 | Ubc      | Ubiquitin C                                                  |
| G11 | NM_009464 | Ucp3     | Uncoupling protein 3 (mitochondrial, proton carrier)         |
| G12 | NM_011728 | Xpa      | Xeroderma pigmentosum, complementation group A               |
| H01 | NM_007393 | Actb     | Actin, beta                                                  |
| H02 | NM_009735 | B2m      | Beta-2 microglobulin                                         |
| H03 | NM_008084 | Gapdh    | Glyceraldehyde-3-phosphate dehydrogenase                     |
| H04 | NM_010368 | Gusb     | Glucuronidase, beta                                          |
| H05 | NM_008302 | Hsp90ab1 | Heat shock protein 90 alpha (cytosolic), class B member 1    |
| H06 | SA_00106  | MGDC     | Mouse Genomic DNA Contamination                              |
| H07 | SA_00104  | RTC      | Reverse Transcription Control                                |
| H08 | SA_00104  | RTC      | Reverse Transcription Control                                |
| H09 | SA_00104  | RTC      | Reverse Transcription Control                                |
| H10 | SA_00103  | PPC      | Positive PCR Control                                         |
| H11 | SA_00103  | PPC      | Positive PCR Control                                         |
| H12 | SA_00103  | PPC      | Positive PCR Control                                         |

**Supplementary Table 1.** Complete gene list of gene array PAMM-062Z.

## Supplementary Table 2

| Gene            | GeneBank #   | sense primer             | antisense primer         | size, bp | r <sup>2</sup> | E    |
|-----------------|--------------|--------------------------|--------------------------|----------|----------------|------|
| Aass            | NM_013930    | CTCTGGCTCCCAAGCACATC     | CCCCAAAATCAGACAGGCTTCT   | 151      | 0,98           | 1,8  |
| Aif1 / IBA1     | NM_0194672   | GTCCTTGAAGCGAATGCTGG     | CATTCTCAAGATGGCAGATC     | 157      | 0,96           | 2,4  |
| Als2            | NM_028717    | GAGAGCTTTTGTCTAATGGGATGG | GCCTGGCAACCTCTCTGGT      | 162      | 0,95           | 2,1  |
| B2m             | NM_009735    | ACTGACCGGCCTGTATGCTA     | CAGTCTCAGTGGGGTGAAT      | 244      | 0,99           | 2,2  |
| CB1R            | NM_007726    | GTGGGCAGCCTGTTCTCA       | CATGCGGGCTTGGTCAGG       | 401      | 0,99           | 1,9  |
| Cyba            | NM_007806    | CATCGTGGCTACTGCTGGAC     | TGGACCCCTTTTCTCTTT       | 116      | 0,96           | 2,2  |
| D1R/Drd1a       | XM_006516848 | CAGAACTGTGACACAAGGTTGAGC | CTGGCAATTCTTGGCATGGACTG  | 177      | 0,99           | 1,6  |
| D2R             | NM_010077    | GCAGTCCGAGCTTTCAGAGCC    | GCTATACCGGTCTCTCTGG      | 206      | 0,98           | 1,9  |
| GapdH           | NM_001001303 | TGTGTCCGTCGTGGATCTGA     | TTGCTGTTGAACTCGCAGGAG    | 150      | 0,99           | 1,9  |
| GFAP            | XR_388347    | ACCAGCTTACGGCCAACAGTG    | TGTCTATACGCAGCCAGGTTGTTC | 138      | 0,995          | 2,14 |
| GLT-1           | KC825358     | CTCACTGACTGTGTTTGGTG     | GAGGTGCCACCAGAACTTTC     | 457      | 0,99           | 2    |
| Glul /GS        | NM_008131    | CACTACCGGGCCTGCTTGAT     | GCATGGCCTTGGTGCTAAAGTTG  | 249      | 0,997          | 2,1  |
| GluN1/NR1/Grin1 | NM_008169    | GCTGTACCTGCTGGACCGCT     | GCAGTGAGGAAGCCACTATGATC  | 218      | 0,99           | 1,9  |
| GluN2A (NR2A)   | NM_008170    | GGTTCTGCATCGACATCC       | GTGAGCCCACAGCCATGACT     | 162      | 0,99           | 1,8  |
| GluN2B /NR2B    | NM_008171    | GCTACAACACCCACGAGAAGAG   | GAGAGGGTCCACGCTTTCC      | 314      | 0,97           | 2,5  |
| GluN2C (NR2C)   | NM_010350    | GCTTCTGCATCGACATCC       | CCATGTCTGCCCGCTTGTA      | 150      | 0,98           | 1,8  |
| Gpx6            | NM_145451    | GCCCAGAAGTTGTGGGGTTC     | TCCATACTCATAGACGGTGCC    | 129      | 0,98           | 2,2  |
| Hsp90           | NM_008302    | GTGCGAGTCGGACTTGGTCCG    | TGCCTGAAAGGCAAAGGTCTCC   | 123      | 0,99           | 1,8  |
| Irgm1           | NM_008326    | ACGAAGACGCGGACTGAGTACT   | CAGAGGCAATGATGAATAAGTCAC | 82       | 0,99           | 2,2  |
| Lcn2            | NM_008491    | CCAGTTCGCCATGGTATTT      | GGGTGAAACGTTCTTCAGT      | 113      | 0,98           | 2,3  |
| MAG             | NM_010758    | GAGACATCCCCAACTCAGGGAGAC | TGTGCGGGACTTGAAGACCA     | 290      | 0,99           | 1,9  |
| mGluR1          | NM_016976    | CCATTTTGTCTACCCG         | GTCATGATCTTGTAGTTGCT     | 246      | 0,97           | 2    |
| mGluR5          | NM_001081414 | GGATATAATGCATGACTATCCA   | GTCATGATTTTGTAGTTGCT     | 232      | 0,98           | 2    |
| eNOS            | NM_008713    | GCAAGACAGACTACACGACATTGA | GAGTACCTCGTCCCGTAGA      | 112      | 0,94           | 2,1  |
| nNOS            | NM_008712    | AGTTTTTGGCAACAGCGACA     | GCAGGGTCTCTCTCTGTAGATATG | 121      | 0,99           | 1,9  |
| Pea15a          | NM_011063    | CAAGGAGGACATCCCCAGT      | CTTCAGCACACGGGTTCTGTA    | 184      | 0,98           | 2    |
| Scd1            | NM_009127    | TCTTGTCCCTATAGCCCAATCCAG | AGCTCAGAGCGCGTGTTCAA     | 130      | 0,98           | 2,3  |
| Scd2            | NM_009128    | AGTGTGCTCGTGAGCCTGTG     | CCTGCAGATCCATGTCCAGCTA   | 140      | 0,99           | 1,9  |
| Scd3            | NM_024450    | TCACACCGTGAACCCTGAGATTGT | TGCTTGCTCTGCCTCTTGACCTAT | 160      | 0,99           | 2    |
| S100β           | NM_009115    | ACGGCTTCCTGCTGGTGTGTTG   | GAGAGAGCTCGTTGTTGATAAGCT | 101      | 0,93           | 1,9  |
| Txnip           | NM_023719    | CAAGTTCGGCTTCGAGCTTC     | ACACTTACCTTGCCAATGGC     | 379      | 0,98           | 1,9  |

**Supplementary Table2.** Primers for real-time RT-PCR. Genebank #: shows reference sequence from NCBI, to which sequenced PCR products had highest homology. Aif1/IBA1, a macrophage/microglia-specific calcium-binding protein; GLT-1: glutamate transporter 1; Glul: glutamate ligase, also known as glutamine synthetase (GS); Lcn2: lipocalin-2, also called oncogene 24p3; MAG: oligodendrocyte marker myelin-associated glycoprotein. For the description of other Gene abbreviations see Supplementary Table1 or text of the manuscript.
